# Supplementary material for: Clinical Features and MicroRNA Expression Patterns Between AML Patients With DNMT3A R882 and Frameshift Mutations
Source: Front Oncol. 2019 Oct 24;9:1133. doi: 10.3389/fonc.2019.01133 (PMC6821681; doi:10.3389/fonc.2019.01133)
Supplement: Supplementary file 1 [file Table_1.XLSX]

## Sheet: Sheet1
Patient characteristics	Number (Percentage)
Age (y)
Median	43
Range	2-93
Sex n/N (%)
Male	56/113（49.5）
Female	57/113（50.5）
AML FAB subtype: n/N (%)
M0	9/113(7.9)
M1	15/113(13.2)
M2	38/113(33.6)
M3	3/113(2.6)
M4/M5	45/113(39.8)
M6	3/113(2.6)
